# Supplementary material for: Nanocomposite of eugenol/polysiloxane/graphene oxide as an efficient anticorrosion and anti-biofouling additive for marine epoxy coatings
Source: Royal Society of Chemistry journal article supplement (doi:10.1039/d5ma01048a), 2025-10-30
Supplement: d5ma01048a1.pdf [file d5ma01048a1.pdf]

*Electronic Supplementary Materials for*

## **Nanocomposite of eugenol/polysiloxane/graphene oxide as an efficient anticorrosion and anti-biofouling additive for marine epoxy coatings**

Nadia Khan,<sup>a</sup> Zahra A. Tabasi,<sup>b</sup> Leila Nazari,<sup>a</sup> Baiyu Zhang,<sup>b</sup> Talia J. Stockmann,<sup>a‡</sup> and Yuming Zhao<sup>a\*</sup>

<sup>a</sup>Department of Chemistry, Memorial University of Newfoundland

St. John's, NL, Canada, A1B 3X7, Tel: +1 709 864 8747, E-mail: yuming@mun.ca

<sup>b</sup>Faculty of Engineering and Applied Science, Memorial University of Newfoundland

St. John's, NL A1B 3X5, Canada

### **Contents**

|                                                                   |            |
|-------------------------------------------------------------------|------------|
| <b>1 Results of EIS Analysis</b>                                  | <b>S-2</b> |
| <b>2 Results of Anti-algal and Anti-bacterial Adhension Tests</b> | <b>S-3</b> |

# 1 Results of EIS Analysis

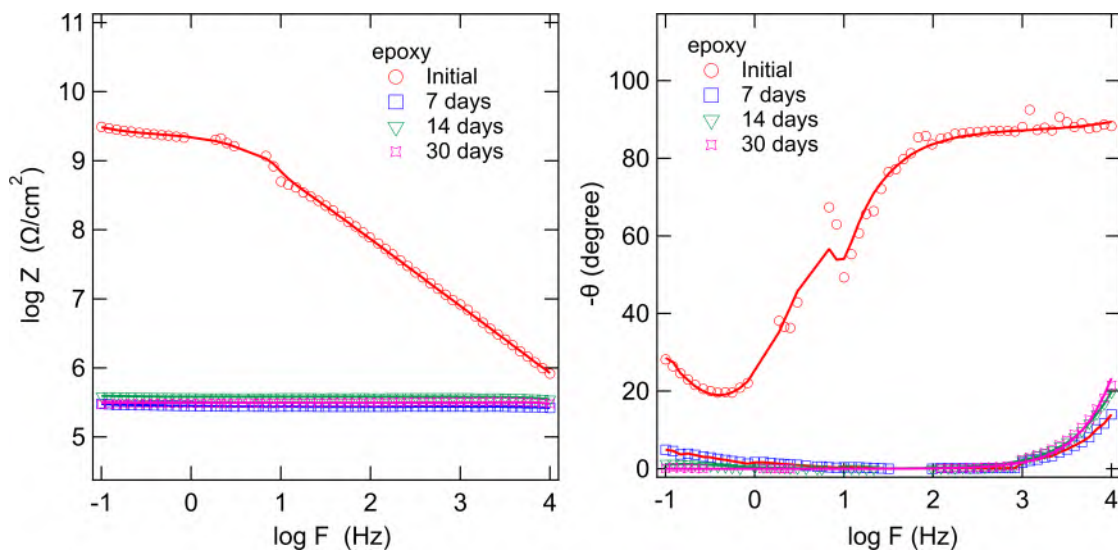

Figure S-1: Bode plots measured for an epoxy coating after immersion in seawater for various time periods.

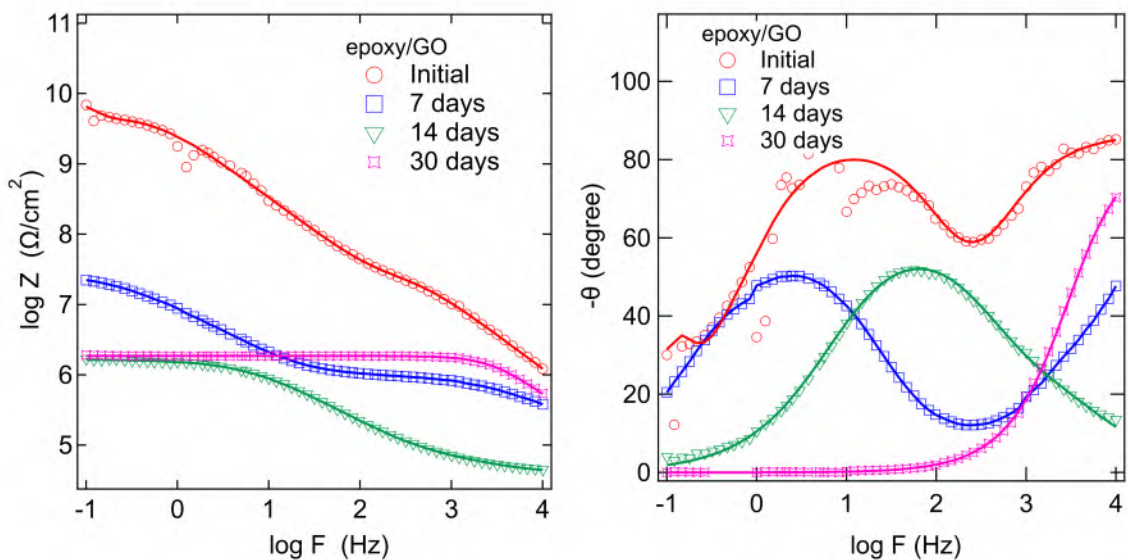

Figure S-2: Bode plots were measured for an epoxy coating modified with **GO** (0.01 wt%) after immersion in seawater for various time periods.

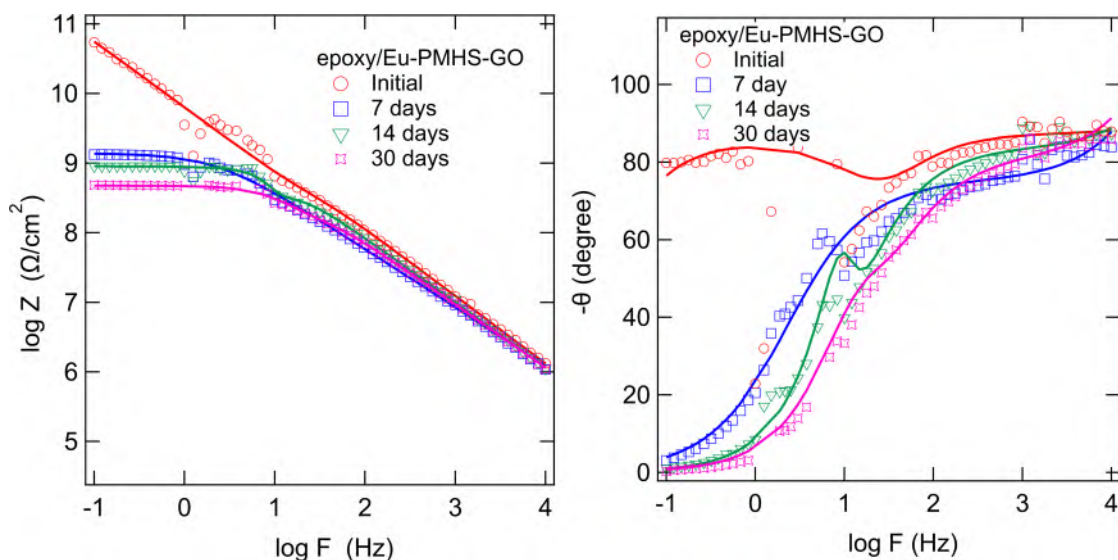

Figure S-3: Bode plots were measured for an epoxy coating modified with **Eu-PMHS-GO** (0.001 wt%) after immersion in seawater for various time periods.

## 2 Results of Anti-algal and Anti-bacterial Adhesion Tests

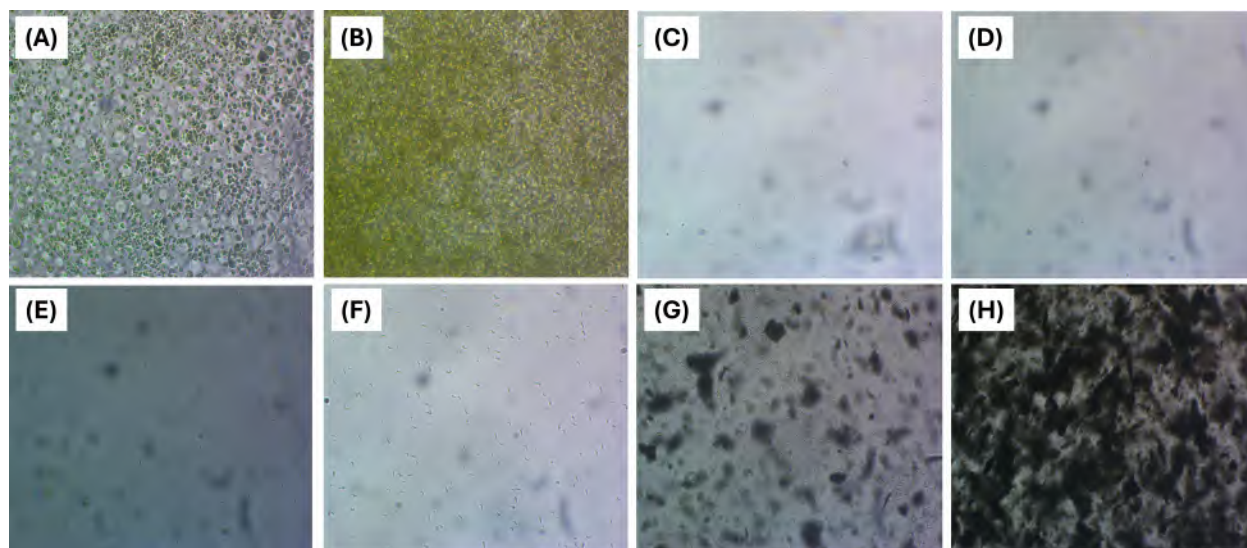

Figure S-4: Photographic images of coating surfaces after incubated in a *P. tricornutum* culture for one week. (A) epoxy, (B) epoxy + **GO** (0.01 wt%), (C) epoxy + **Eu-PMHS-GO** (0.001 wt%), (D) epoxy + **Eu-PMHS-GO** (0.005 wt%), (E) epoxy + **Eu-PMHS-GO** (0.01 wt%), (F) epoxy + **Eu-PMHS-GO** (0.05 wt%), (G) epoxy + **Eu-PMHS-GO** (0.1 wt%), and (H) epoxy + **Eu-PMHS-GO** (0.5 wt%).

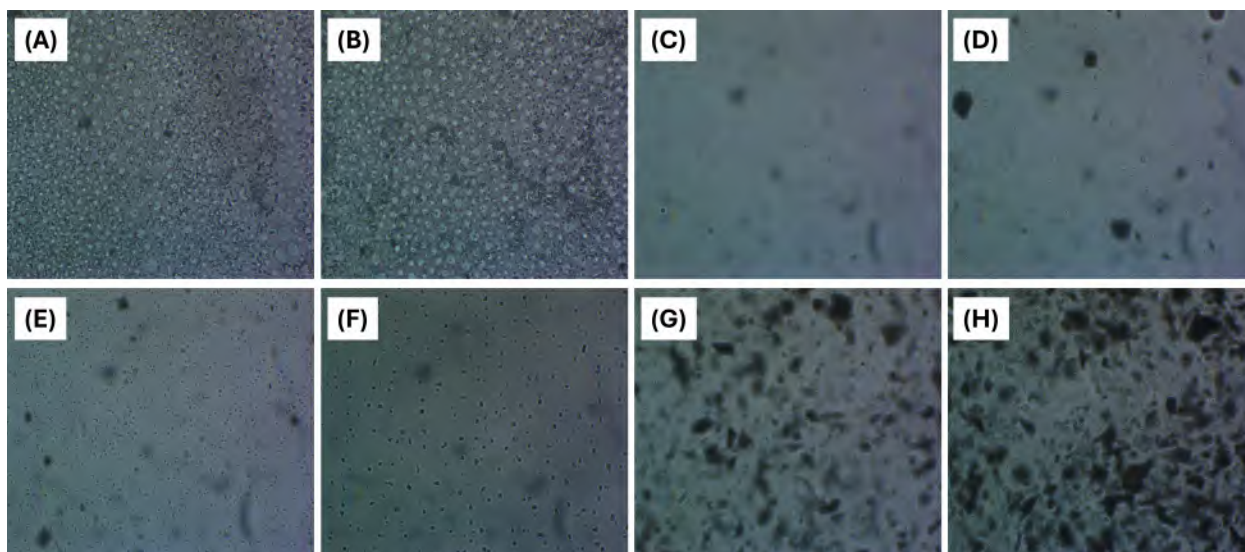

Figure S-5: Photographic images of coating surfaces after incubated in a *B. Subtilis* culture for one week. (A) epoxy, (B) epoxy + **GO** (0.01 wt%), (C) epoxy + **Eu-PMHS-GO** (0.001 wt%), (D) epoxy + **Eu-PMHS-GO** (0.005 wt%), (E) epoxy + **Eu-PMHS-GO** (0.01 wt%), (F) epoxy + **Eu-PMHS-GO** (0.05 wt%), (G) epoxy + **Eu-PMHS-GO** (0.1 wt%), and (H) epoxy + **Eu-PMHS-GO** (0.5 wt%).

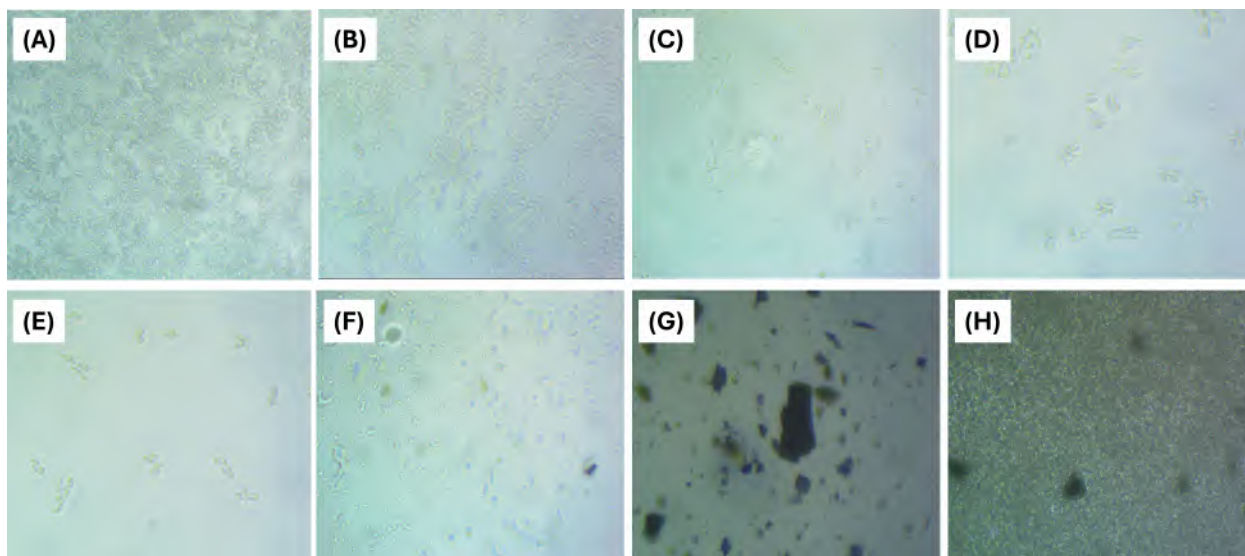

Figure S-6: Photographic images of coating surfaces after incubated in a *Synechococcus sp.* culture for one week. (A) epoxy, (B) epoxy + **GO** (0.01 wt%), (C) epoxy + **Eu-PMHS-GO** (0.001 wt%), (D) epoxy + **Eu-PMHS-GO** (0.005 wt%), (E) epoxy + **Eu-PMHS-GO** (0.01 wt%), (F) epoxy + **Eu-PMHS-GO** (0.05 wt%), (G) epoxy + **Eu-PMHS-GO** (0.1 wt%), and (H) epoxy + **Eu-PMHS-GO** (0.5 wt%).
